# Supplementary material for: CaFtsH06, A Novel Filamentous Thermosensitive Protease Gene, Is Involved in Heat, Salt, and Drought Stress Tolerance of Pepper (Capsicum annuum L.)
Source: MDPI journal article supplement (doi:10.3390/ijms22136953), 2021-06-28
Supplement: s1 [file s1]

# Supplementary Material

**Table S1.** List of *CaFtsHs* family genes identified in pepper and their sequence characteristics. The proteomic information was obtained from EXPASY (Available online: <http://web.expasy.org/protparam/>).

| Number | Name      | Gene ID         | Chromosome | Number of Intron | Predicted Protein Length | Molecular Weight (KD) | Isoelectric Point | Instability Index |
|--------|-----------|-----------------|------------|------------------|--------------------------|-----------------------|-------------------|-------------------|
| 1      | CaFstH1   | Capana04g000110 | 4          | 4                | 710                      | 76.29                 | 6.00              | 34.95             |
| 2      | CaF-stH06 | Capana07g001803 | 7          | 3                | 721                      | 77.54                 | 6.29              | 31.99             |
| 3      | CaFstH5   | Capana05g001818 | 5          | 6                | 721                      | 77.71                 | 9.21              | 44.65             |
| 4      | CaFstH4   | Capana08g000315 | 8          | 4                | 422                      | 47.31                 | 6.49              | 42.19             |
| 5      | CaFstH7   | Capana00g003035 | un         | 12               | 711                      | 76.77                 | 5.97              | 40.01             |
| 6      | CaFstH2   | Capana00g002383 | un         | 5                | 692                      | 77.09                 | 7.63              | 34.24             |
| 7      | CaFstH8   | Capana10g001411 | 10         | 5                | 643                      | 71.82                 | 5.68              | 33.09             |
| 8      | CaFstH9   | Capana09g001789 | 9          | 7                | 820                      | 90.47                 | 8.39              | 37.14             |
| 9      | CaF-stH10 | Capana10g001412 | 10         | 7                | 814                      | 89.49                 | 7.98              | 35.86             |
| 10     | CaF-stH11 | Capana03g002053 | 3          | 16               | 405                      | 44.65                 | 6.29              | 45.45             |
| 11     | CaFstH3   | Capana03g003013 | 3          | 17               | 452                      | 51.01                 | 4.97              | 46.07             |
| 12     | CaF-stH12 | Capana06g001351 | 6          | 18               | 480                      | 55.36                 | 5.40              | 36.37             |

**Table S2.** Transcriptome data analysis of *CaFtsHs* family genes in pepper during different tissues development.

| GenID           | Different tissues |        |       |        |       |        |        |        |        |       |        |
|-----------------|-------------------|--------|-------|--------|-------|--------|--------|--------|--------|-------|--------|
|                 | L1                | L9     | F1    | F9     | FST0  | T5     | T11    | G5     | G11    | S5    | S11    |
| Capana04g000110 | 286.33            | 710.58 | 76.01 | 63.03  | 96.75 | 83.94  | 160.93 | 148.43 | 641.63 | 31.34 | 22.46  |
| Capana07g001803 | 336.21            | 838.44 | 53.10 | 122.26 | 92.43 | 124.04 | 306.94 | 202.53 | 755.50 | 26.44 | 94.86  |
| Capana05g001818 | 116.61            | 178.78 | 59.29 | 105.29 | 77.36 | 102.68 | 70.32  | 84.13  | 69.05  | 69.70 | 76.89  |
| Capana08g000315 | 31.99             | 43.70  | 32.62 | 51.04  | 36.30 | 82.79  | 137.55 | 89.20  | 142.06 | 46.80 | 117.04 |
| Capana00g003035 | 24.66             | 36.64  | 20.63 | 16.29  | 23.69 | 27.75  | 28.15  | 26.32  | 33.17  | 12.28 | 25.54  |
| Capana00g002383 | 13.03             | 17.08  | 15.18 | 8.65   | 11.95 | 8.73   | 6.65   | 9.28   | 4.76   | 7.38  | 7.26   |
| Capana10g001411 | 5.97              | 10.20  | 11.60 | 10.97  | 9.88  | 4.74   | 4.22   | 5.30   | 2.82   | 1.70  | 1.24   |
| Capana09g001789 | 62.70             | 58.57  | 71.85 | 118.29 | 53.59 | 56.19  | 54.93  | 35.12  | 50.94  | 67.42 | 60.54  |
| Capana10g001412 | 39.12             | 42.69  | 35.14 | 100.19 | 39.89 | 42.91  | 39.90  | 42.45  | 46.92  | 36.91 | 21.81  |
| Capana03g002053 | 59.10             | 132.34 | 24.03 | 18.71  | 25.03 | 19.99  | 18.76  | 38.73  | 29.93  | 8.69  | 11.22  |
| Capana03g003013 | 26.19             | 36.01  | 18.92 | 7.61   | 20.77 | 12.56  | 12.80  | 27.84  | 24.27  | 8.78  | 17.05  |
| Capana06g001351 | 0.21              | 0.04   | 0.37  | 0.03   | 0.11  | 0.13   | 0.10   | 0.12   | 0.21   | 0.22  | 0.04   |

**Table S3.** Transcriptome data analysis of *CaFtsHs* family genes in pepper during different stress treatments (including heat, salt and osmotic stress).

| GenID           | Leaf   |        |        |        |        |        |        | Root   |       |        |       |       |       |        |
|-----------------|--------|--------|--------|--------|--------|--------|--------|--------|-------|--------|-------|-------|-------|--------|
|                 | CL0    | HL1    | HL2    | HL3    | HL4    | HL5    | HL6    | CR0    | HR1   | HR2    | HR3   | HR4   | HR5   | HR6    |
| Capana04g000110 | 318.17 | 275.51 | 216.52 | 241.03 | 179.11 | 137.19 | 338.77 | 214.31 | 28.35 | 174.37 | 13.33 | 13.62 | 7.56  | 13.56  |
| Capana07g001803 | 424.00 | 330.98 | 277.39 | 295.8  | 515.21 | 546.42 | 633.80 | 372.34 | 34.21 | 226.23 | 37.04 | 49.2  | 41.57 | 63.05  |
| Capana05g001818 | 34.36  | 22.78  | 19.36  | 40.33  | 85.56  | 70.33  | 62.84  | 38.04  | 48.50 | 49.21  | 41.92 | 48.80 | 44.01 | 34.23  |
| Capana08g000315 | 47.43  | 26.86  | 27.94  | 43.93  | 76.47  | 98.42  | 98.53  | 40.4   | 45.64 | 39.58  | 48.98 | 71.64 | 80.41 | 110.85 |
| Capana00g003035 | 17.77  | 14.91  | 10.65  | 8.61   | 18.00  | 16.93  | 24.13  | 13.68  | 16.09 | 13.38  | 14.02 | 15.34 | 10.41 | 29.94  |
| Capana00g002383 | 5.87   | 3.38   | 3.48   | 4.08   | 10.04  | 12.49  | 15.00  | 7.47   | 9.85  | 7.64   | 9.89  | 10.75 | 13.42 | 15.18  |
| Capana10g001411 | 5.14   | 0.95   | 0.47   | 0.60   | 2.34   | 5.30   | 6.94   | 3.68   | 4.37  | 3.61   | 1.51  | 2.75  | 1.09  | 1.54   |
| Capana09g001789 | 69.67  | 23.64  | 18.05  | 19.55  | 33.14  | 40.48  | 50.1   | 54.31  | 53.91 | 54.42  | 31.22 | 37.52 | 30.09 | 37.02  |
| Capana10g001412 | 25.91  | 15.11  | 11.76  | 12.42  | 24.46  | 28.19  | 31.36  | 24.58  | 29.64 | 30.59  | 21.27 | 21.86 | 16.74 | 17.88  |
| Capana03g002053 | 65.87  | 49.26  | 46.94  | 39.26  | 40.09  | 107.39 | 64.72  | 62.98  | 10.16 | 33.31  | 5.08  | 9.02  | 11.19 | 18.86  |
| Capana03g003013 | 21.41  | 11.36  | 7.88   | 8.27   | 7.66   | 14.22  | 16.39  | 14.2   | 8.97  | 7.95   | 5.88  | 5.39  | 6.05  | 23.12  |
| Capana06g001351 | 0.39   | 0.16   | 0.16   | 0.00   | 0.09   | 0.13   | 0.12   | 0.38   | 0.16  | 0.04   | 0.07  | 0.04  | 0.00  | 0.11   |

**Table S4.** Primer sequences were used for qRT-PCR.

| Gene name       | Accession Number | Forward primer (5'→3')    | Reverse primer (5'→3')      |
|-----------------|------------------|---------------------------|-----------------------------|
| <i>CaUbi3</i>   | AY486137         | ATGGGTTCTGCTTCAATGG       | TCATACTTTTTTACTGTTTGATGTTAG |
| <i>CaFtsH06</i> | Capana07g001803  | ATGGCTACTTCATCAGTATGC     | ATTAGGTGGATGAGTGTATGAAT     |
| <i>AtHSP101</i> | At1G74310        | TGCATTAGCTGGTGCTTTGAT     | CCACCGGCACTAGAGATTGC        |
| <i>AtAPX2</i>   | At3G09640        | AATATGCTGCAGATGAGGATGC    | CAAGAATCAAGGAGGTAGGAGATG    |
| <i>AtSOD1</i>   | At1G08830        | TCAACTGGAAATATGCAAGCGAGGT | ACCACACAGCTGAGTTGAGCAAA     |
| <i>AtCAT1</i>   | At1G20630        | AGCGCTTTCGGAGCCTCGTG      | GGCCTCACGTTAAGACGAGTTGC     |
| <i>AtGPX3</i>   | AT2G43350        | GGGTCAATCAGCGAGCTAC       | CGATGGCGAAGAAGGGTATC        |
| <i>AtMYB44</i>  | AT5G67300        | GGAAGTGGTAACATCAGGAGGC    | TTCTTTGCTCTCTTCTGTATCCATC   |
| <i>AtRD29a</i>  | AT5G52310        | TGTGCCGACGGGATTTG         | CTGATGCCTCACCGTATCCA        |
| <i>AtDREB2A</i> | AT5G05410        | AAGGATTTGGGGTAAATGGGTTG   | CAGCCTCATCATAAGCAGAAGCA     |
| <i>AtActin2</i> | At3G18780        | CTGTACGGTAACATTGTGCTCAG   | CCGATCCAGACACTGTACTTCC      |

**Table S5.** Primers for subcellular localization of *CaFtsH06*.

| Primer Name    | Primer sequence (5'→3')            | Enzymes       |
|----------------|------------------------------------|---------------|
| <i>CaFtsH6</i> | F: CGGGATCCATGGCTACTTCATCAGTATGC   | <i>BamH I</i> |
|                | R: GGGGTACCATTAGGTGGATGAGTGTATGAAT | <i>Kpn I</i>  |

Note: Highlighted text indicated the enzymes.

**Table S6.** The CDS sequence of *CaFtsH06* (Accession no. Capana07g001803).

ATGGCTACTTCATCAGTATGCATAGCAGGAAATGGTTTGTGTC-  
 TACACATAAAACACAGAAAGTCTTTAAGAAGGATGTTTATGGAAGGAAAATTTTATATTCCCTCAAATCTTCCATCGTCTGGTAA  
 AACGTCAAGAGTAGTTGTAAAAGCATCTCTTCAGCAAAGGCCGGATGAAGGAAGAA-  
 GAGGCTTTCTTAAATTATTGCTTGGAATGTTGGGCTTGGAGCGCTGCTTTGTTAGGTAATGGAAAAGCCTATGCTGATGAGC  
 AAGGTGTTTCTAACTCAAGGATGTCTTATTCTAGATTTTTGGAATATCTGGACAAGGA-  
 TAGGGTGCAAAAAGTAGATTTGTTTGAAAACGGAACCATAGCTATTGTTGAGGCTGTATCTCCAGAATTAGGAAACCGGGTGCA  
 AAGAGTTAGGGTACAACCTACCCGGGCTCAGCCAGGAACCTTCTTCAAAAGTTCCGG-  
 GAAAAAACATCGATTTTGCTGCTCACAATGCTCAAGAGGACTCAGGTTCTCTCATATTCAACTTGATTGGAAATCTGGCATTCTC  
 CCGCTTATTTTGATTGGTGGTCTTTTCTGCTATCAAGGCGGTCTAACGGAGGAATGG-  
 GAGGTCTGGTGGGCTGGTAACCCACTAGCATTTGGTCAATCAAAAGCTAAGTTCCAAATGGAACCAACACTGGTGTGACAT  
 TTGATGATGTTGCTGGTGTAGATGAAGCAAAACAAGATTTTATGGAGGTTGTAGAATTTTT-  
 GAAGAAACCTGAGAGGTTCACTGCAGTGGGGCTCGTATTCCAAAAGGTGTTCTTCTTGTGGTCTCCTGGTACGGGGAAGAC  
 CCTGCTAGCAAAGCAATTGCTGGTGAA-  
 GCGGGTGTTCCATTTTTCTCAATTTTCAGGTTTCAGAATTCGTCGAGATGTTTGTGGTGTGGAGCCTCTCGAGTCCGTGATCTT  
 TTCAAGAAGGCCAAGGAAAATGCTCCCTGCATTTGATTTGTTGATGAAATTGATGCTGTT-  
 GGGCGACAAAGAGGGACTGGAATCGGAGGAGGGAATGATGAAAGAGAACAGACCTGAACCAACTATTGACGGAAATGGATGGT  
 TTTGAAGGAAATACTGGTATAATAGTTGTTGCAGCAACCAATCGTGCAGATATTTCTCGAT-  
 TCGGCTTTGCTGTGACAACCTGGTGCTGCTGGTGATTTGTCAGCAGATCACCAGTTTGGCAAAACAGATGGTTGTCACTTTTGGGA  
 TGTCTGAACTTGGCCAGACCAGGACGCTTTGATAGACAAGTATCTGTGGATGTTCCAGA-  
 CATCAAGGGAAGAACAGAGATCTTAAAGGTTTCATGCCGGCAACAAGAAGTTCGATTTCAGATGTGTCTCTTGAAGTTATTGCCAT  
 GAGGACACCTGGCTTCAGTGGAGCAGATCTTGCTAACCTCTTGAATGAAGCAGCCATTCTT-  
 GCAGGTGCGGCTGGTAAAACAGCAATCGCATCCAAAGAGATTGATGATTCAATTGACAGGATAGTGGCTGGAATGGAAGGAACA  
 GTAATGACTGATGGCAAGAGCAAGAGTCTTGTGGCATATCACGAAGTT-  
 GGACATGCCATCTGTGGAACCTCTCACTCCAGGGCATGATCCTGTTCAAAAGGTCCTCTAATCCCACGTGGTCAGGCAAAAGGT  
 TTGACCTGGTTCATTCTGTCAGATGATCCAACCTTAATATCCAAGCAGCAACTCTTCGCTA-  
 GAATTGTCGGTGGACTTGGTGGAAGAGCTGCAGAGGAAGTGATCTTTGGTGCACCTGAAGCCTGGTCACTCATGGATGCTTCAG  
 CCCAAAGTGGTGATGTAATCATGAGAATGATGGCCAGGAACCTCAATGTCAGAAAA-  
 GCTAGCTGAAGACATCGATGCTGCTGTGAAGAGGCTTTTCAGACAGTGCATATGAGATTGCGTTGAGCCAAATCCGCAGCAACCG  
 TGAAGCCATTGATAAGATTGTGGAAGTCCCTCCTTGAAAAGGAGACGATGACAGGA-  
 GATGAATTCCGTGCTATTCTCTCAGAATTTGTGGAAATTCCTGCTAAACCCGTGTCCCTGCTGCTGTACCTACCCCAGCAGCCG

**Table S7.** Primers for gene silencing of *CaFtsH06*.

| Primer Name    | Primer sequence (5'→3')          | Enzymes       |
|----------------|----------------------------------|---------------|
| <i>CaFtsH6</i> | F: CGGGATCCATTCCCTCAAATCTTCCATCG | <i>BamH I</i> |
|                | R: GGGGTACCTGCACCCGGTTTCCTAA     | <i>Kpn I</i>  |

Note: Highlighted text indicated the enzymes.

**Table S8.** Primer pairs for transformation of *CaFtsH06*.

| Primer Name    | Primer sequence (5'→3')             | Enzymes       |
|----------------|-------------------------------------|---------------|
| <i>CaFtsH6</i> | F: CGGGATCCATGGCTACTTCATCAGTATGC    | <i>BamH I</i> |
|                | R: GGGGTACCTATTAGGTGGATGAGTGTATGAAT | <i>Kpn I</i>  |

Note: Highlighted text indicated the enzymes.

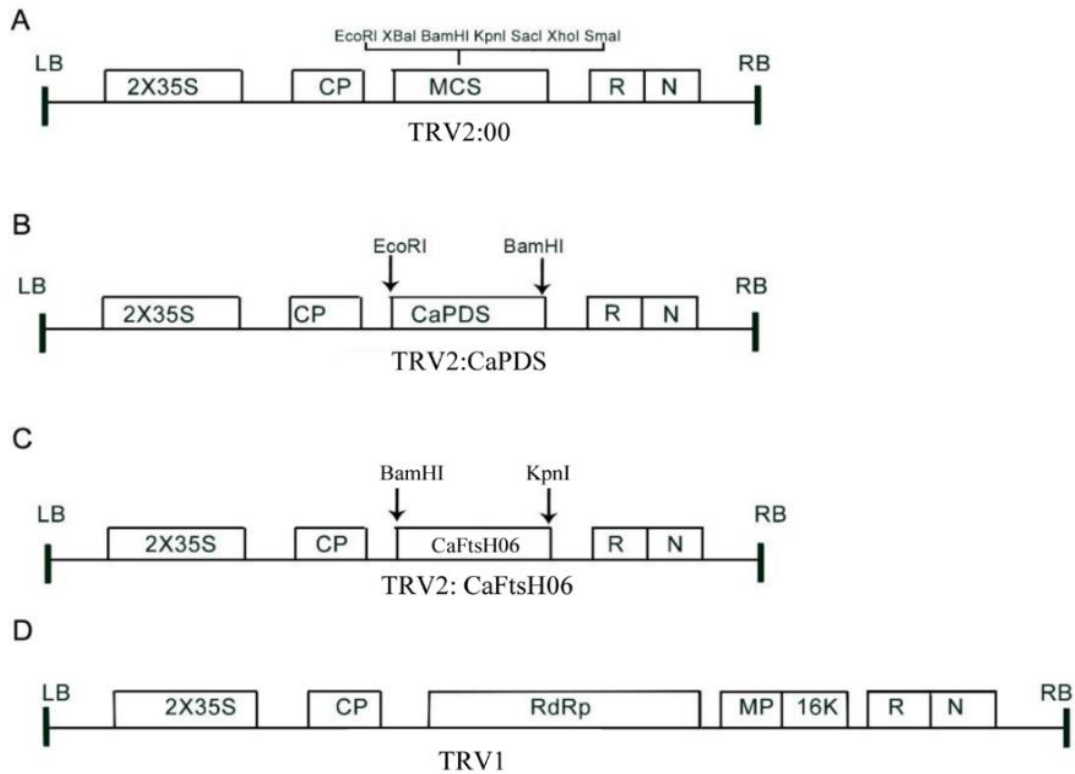

**Figure S1.** Structure of TRV2 vector for VIGS system. (A) the empty TRV2 vector; (B) TRV2:CaPDS vector; (C) TRV2:CaFtsH06 vector; (D) TRV1 vector. LB and RB: the left and right borders of TRV2 vector DNA; CP: coat protein; MP: movement proteins; 2 × 35S: two copies of the TRV2 with 35 promoter; RdRp: RNA-dependent RNA polymerase; 16 K: 16 KDa protein; MCS: multiple cloning sites; R and N: ribozyme and no-terminator.

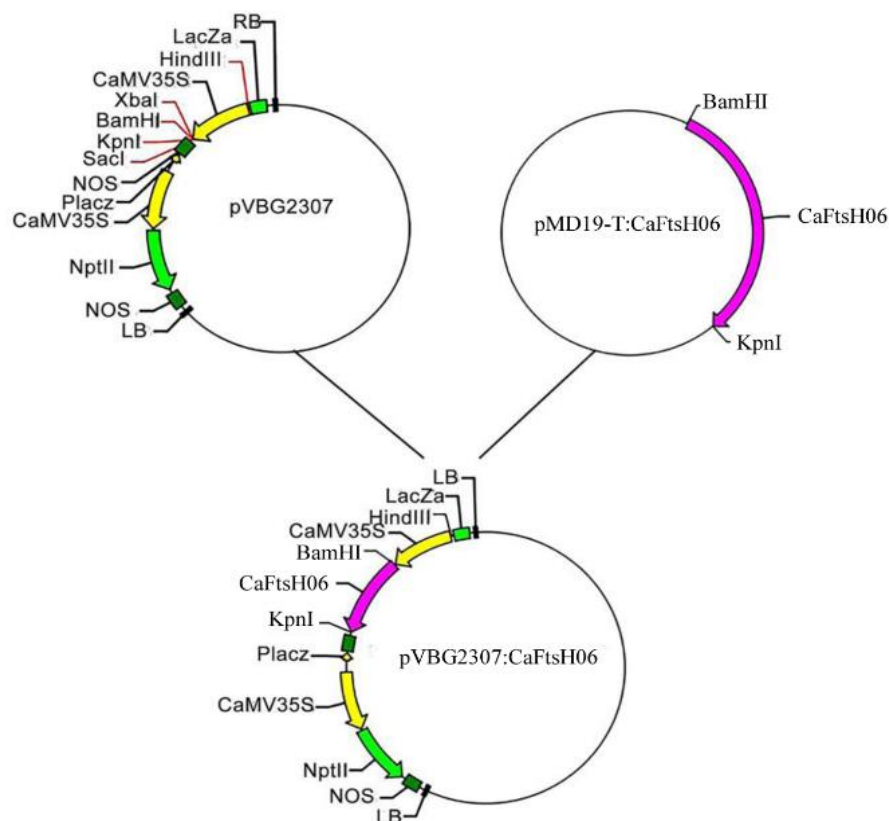

**Figure S2.** Structure of pVBG2307 vector for transgenic *Arabidopsis*.

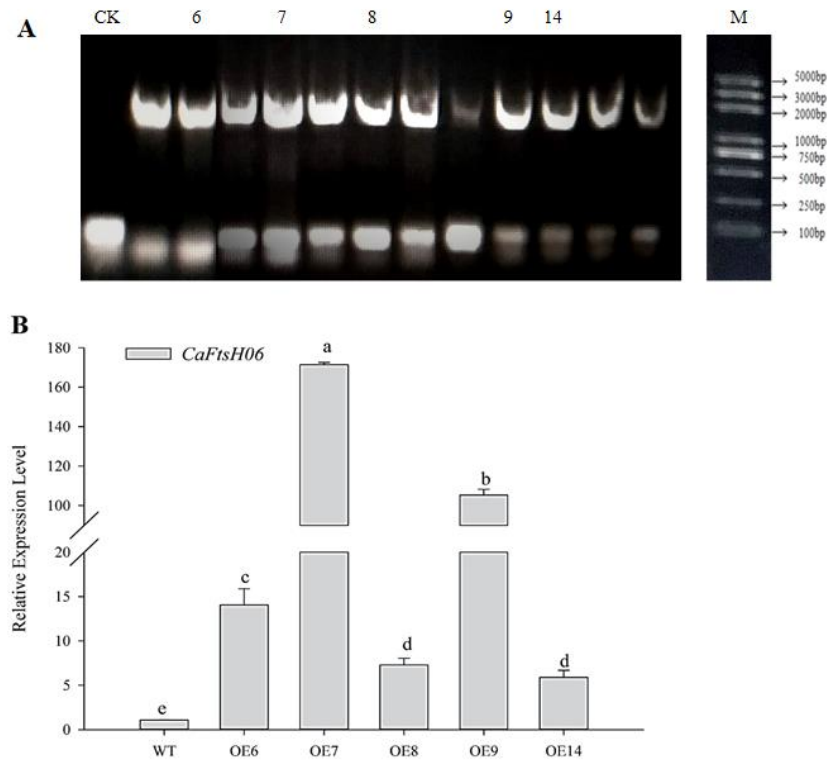

**Figure S3.** Detection and selection of the transgenic *Arabidopsis* lines. **(A)** PCR analysis of the *CaFtsH06* gene in wild type (WT) and *CaFtsH06*-OE *Arabidopsis*; **(B)** Relative expression level of WT and *CaFtsH06*-OE *Arabidopsis* lines (OE6, OE7, OE8, OE9, OE14) under normal conditions; The error bars represent SD for three biological replicates, and the lowercase showed the significant level at  $\alpha = 0.05$ .
